# Supplementary material for: Nanopriming of Barley Seeds—A Shotgun Approach to Improve Germination under Salt Stress Conditions by Regulating of Reactive Oxygen Species
Source: MDPI journal article supplement (doi:10.3390/plants12020405), 2023-01-15
Supplement: s1 [file s1]

Table S1. Primers of genes coding for antioxidant enzymes used in qRT-PCR.

| <b>Target gene (accessions)</b> | <b>Forward primer 5'– 3' sequence</b> | <b>Reverse primer 5'– 3' sequence</b> |
|---------------------------------|---------------------------------------|---------------------------------------|
| <i>HvSOD</i> (AK252295)         | CCGAAGATGAAATCCGCCAT                  | GCCTCCTGATCCATGGCGCCGAC               |
| <i>HvCAT</i> (U20778)           | CCATAAGGGACCATGCATGCCAGCTAC           | GCTCGAAGCACCCACTTTAGTTTAAGC           |
| <i>HvGR</i> (AK376974)          | TGGAGGCTACTTGCTTTGCT                  | AGATAGCGGCGGAATACAGA                  |
| <i>HvGPX</i>                    | CTGATCCCGCACTACAGCTT                  | CCCGTCCTTGAGCATCTTCC                  |
| <i>Hvactin</i> (AY145451)       | GCCGTGCTTTCCTCTATG                    | GCTTCTCCTTGATGTCCCTTA                 |
